# Supplementary material for: Fluorescence Spectroscopy of Enantiomeric Amide Compounds Enforced by Chiral Light
Source: MDPI journal article supplement (doi:10.3390/app112311375), 2021-12-01

# Fluorescence Spectroscopy of Enantiomeric Amide Compounds Enforced by Chiral Light

Alessandro Belardini \*, Emilija Petronijevic, Ramin Ghahri, Daniele Rocco, Fabiana Pandolfi, Concita Sibilia and Leonardo Mattiello \*

## Experimental section

### Chemical synthesis

CDI (162 mg, 1 mmol) and 9-oxo-9H-fluorene-2-carboxylic acid (224 mg, 1 mmol) were suspended in 15 mL of ethyl acetate (AcOEt) and the reaction mixture was left under stirring at reflux for 4 hours. Then, (*R*)-1-phenylethanamine or (*S*)-1-phenylethanamine ( $d = 0.952 \text{ g/mL}$ , 127  $\mu\text{L}$ , 1 mmol) was added and the solution was refluxed overnight. After this time, the solvent was evaporated under reduced pressure and the residue was purified by silica gel column chromatography using initially a mixture of petroleum ether and ethyl acetate 7:3 ( $R_f = 0.25$ ) and subsequently 1:1 ( $R_f = 0.63$ ) to give a yellowish solid, that was crystallized from ethyl acetate. The compounds *R*-FA1 and *S*-FA1 were obtained with yields of ca. 65% on the basis of isolated products.

#### *R*-FA1

$^1\text{H-NMR}$  (DMSO- $d_6$ )  $\delta$  (ppm): 9.04 (d,  $J = 7.6 \text{ Hz}$ , 1H); 8.18 (s, 1H); 8.15–8.13 (m, 1H); 7.91–7.87 (m, 2H); 7.68–7.64 (m, 2H); 7.46–7.40 (m, 3H); 7.34 (t,  $J = 7.2 \text{ Hz}$ , 2H); 7.25–7.22 (m, 1H); 5.22–5.15 (m, 1H); 1.50 (d,  $J = 6.8 \text{ Hz}$ , 3H).

$^{13}\text{C-NMR}$  (DMF- $d_7$ )  $\delta$  (ppm): 192.8, 164.8, 146.9, 145.3, 143.8, 136.1, 135.7, 134.9, 134.6, 134.0, 130.3, 128.6, 126.9, 126.5, 124.2, 122.7, 122.0, 121.2, 49.4, 22.0.

IR ( $\nu \text{ cm}^{-1}$ ): 3320, 2971, 1720, 1627, 1615, 1531, 1455, 1377, 1363, 1319, 1264, 1212, 1191, 1132, 1039, 1016, 962, 856.

GC-MS,  $R_t = 56.77 \text{ min}$ ,  $m/z$  (relative intensity): 327 (30%), 207 (100%), 179 (15%), 151 (30%).

$[\alpha]^{20}_{\text{D}} = -148.9$  ( $c$  0.11, DMF).

#### *S*-FA1

$^1\text{H-NMR}$  (DMSO- $d_6$ )  $\delta$  (ppm): 9.04 (d,  $J = 7.6 \text{ Hz}$ , 1H); 8.18 (s, 1H); 8.15–8.13 (m, 1H); 7.91–7.87 (m, 2H); 7.68–7.64 (m, 2H); 7.46–7.40 (m, 3H); 7.34 (t,  $J = 7.2 \text{ Hz}$ , 2H); 7.25–7.22 (m, 1H); 5.22–5.15 (m, 1H); 1.50 (d,  $J = 6.8 \text{ Hz}$ , 3H).

$^{13}\text{C-NMR}$  (DMF- $d_7$ )  $\delta$  (ppm): 192.8, 164.8, 146.9, 145.3, 143.8, 136.1, 135.7, 134.9, 134.6, 134.0, 130.3, 128.6, 126.9, 126.5, 124.2, 122.7, 122.0, 121.2, 49.4, 22.0.

IR ( $\nu \text{ cm}^{-1}$ ): 3320, 2971, 1720, 1627, 1615, 1532, 1455, 1377, 1363, 1319, 1264, 1212, 1191, 1132, 1039, 1015, 962, 856.

GC-MS,  $R_t = 56.77 \text{ min}$ ,  $m/z$  (relative intensity): 327 (30%), 207 (100%), 179 (15%), 151 (30%).

$[\alpha]^{20}_{\text{D}} = +148.9$  ( $c$  0.09, DMF).

**$^1\text{H}$ -NMR and  $^{13}\text{C}$ -NMR Spectra of R-FA1**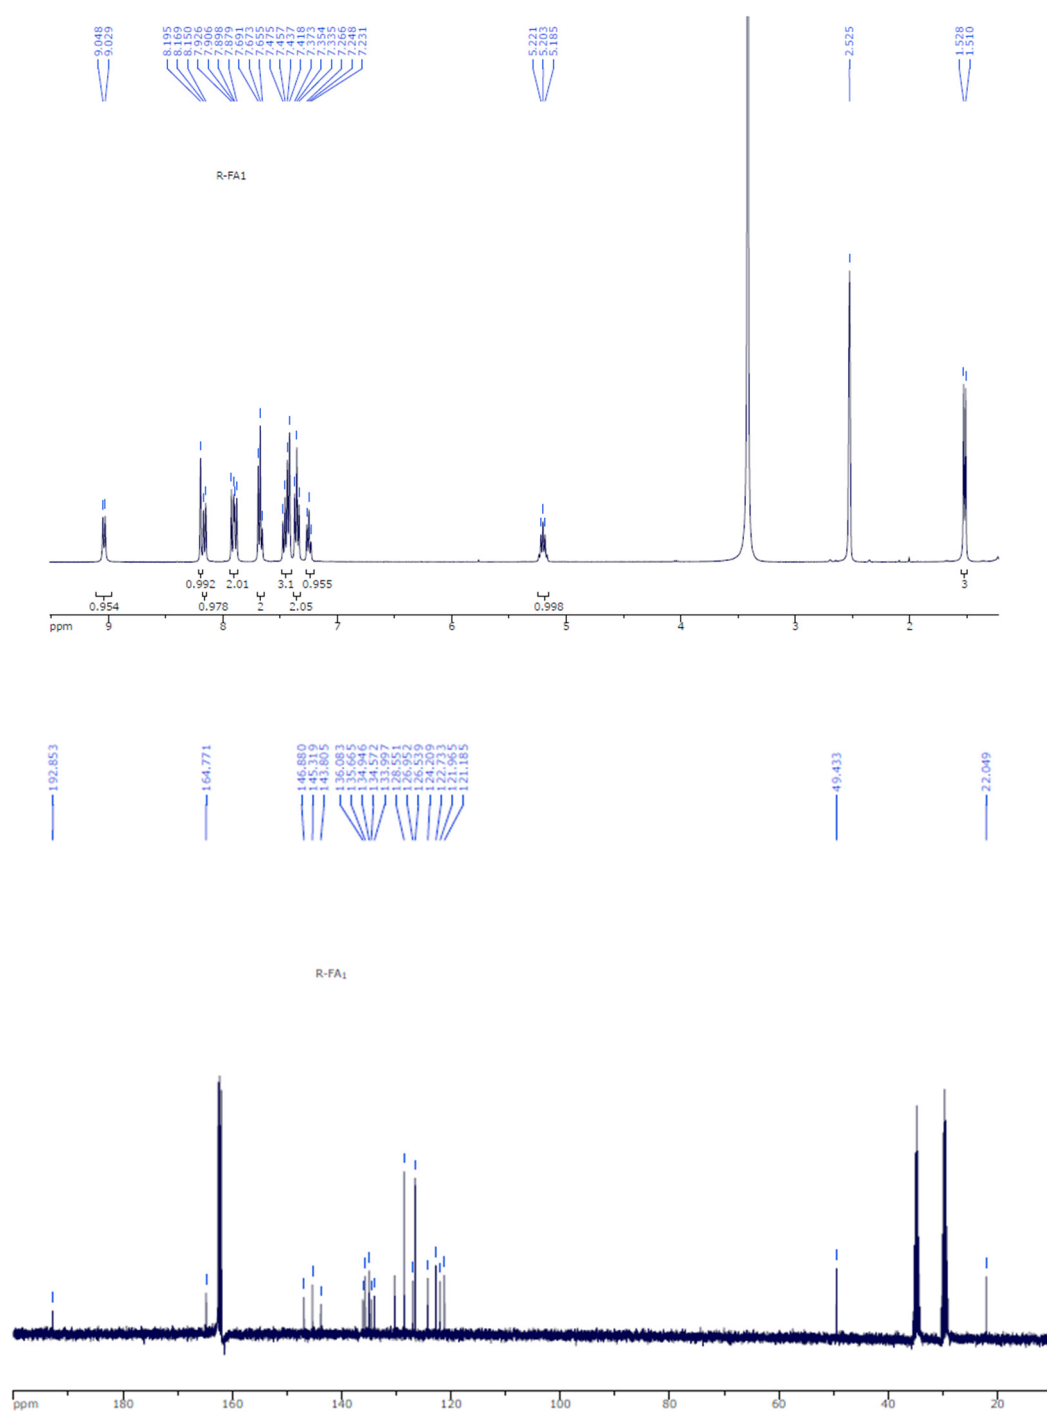 **$^1\text{H}$ -NMR and  $^{13}\text{C}$ -NMR Spectra of S-FA1**

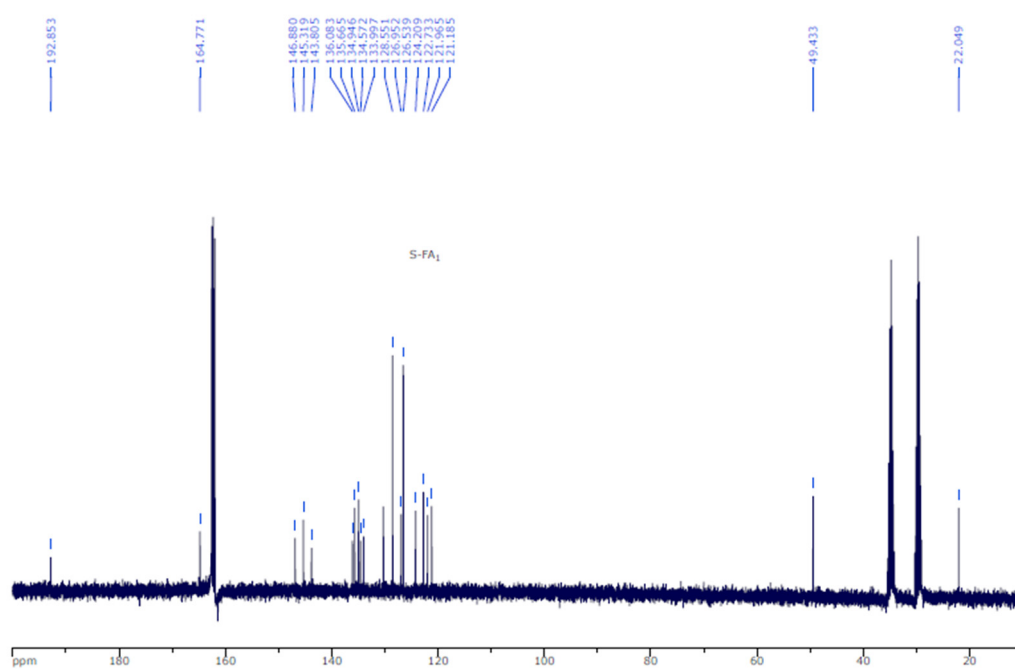

Supplement: s1 [file s1]
